# Supplementary material
Source: PubMed Central journal article supplement (PMC6804623)
Supplement: DB181278SupplementaryData.pdf [file DB181278SupplementaryData.pdf]

SUPPLEMENTARY DATA

**A protective effect of PPAR $\alpha$  in endothelial progenitor cells through regulating metabolism**

**Running title: PPAR $\alpha$  in ECFC metabolism**

Yan Shao<sup>1,2,3</sup>, Jianglei Chen<sup>3</sup>, Li-jie Dong<sup>1,3</sup>, Xuemin He<sup>3</sup>, Rui Cheng<sup>3</sup>, Kelu Zhou<sup>3</sup>,  
Juping Liu<sup>1</sup>, Fangfang Qiu<sup>3</sup>, Xiao-rong Li<sup>1,2\*</sup> and Jian-xing Ma<sup>3,4\*</sup>

<sup>1</sup>Eye Institute and School of Optometry, Tianjin Medical University Eye Hospital, Tianjin, China

<sup>2</sup>Tianjin Key Laboratory of Retinal Functions and Diseases, Eye Institute and School of Optometry, Tianjin Medical University Eye Hospital, Tianjin, China

<sup>3</sup>Department of Physiology, <sup>4</sup>Harold Hamm Diabetes Center, University of Oklahoma Health Sciences Center, Oklahoma City, OK 73014, USA

**\* Correspondence to:**

Xiao-rong Li, Eye Institute and School of Optometry, Tianjin Medical University Eye Hospital, 251 Fukang Road, Xi-qing District, Tianjin, China; Tel: 86-22-86428729 E-mail: [xiaorli@163.com](mailto:xiaorli@163.com)

Jian-Xing Ma, University of Oklahoma, Health Sciences Center, BSEB 328B, 941 Stanton L. Young Blvd, Oklahoma City, OK 73104, USA

Tel: 405-271-4372; E-mail: [jian-xing-ma@ouhsc.edu](mailto:jian-xing-ma@ouhsc.edu)

SUPPLEMENTARY DATA

**Supplementary Figure 1. ECFC identification.** ECFC were washed twice (5 min each) using PBS. The cells were incubated with Dil-ac-LDL (A: Red) at 37°C for 2-hour and fixed with 4% paraformaldehyde for 20 min. The cells were then washed 3 times (5 min each), fixed with 2% paraformaldehyde (10 min). The cells were subsequently incubated with FITC-UEA (B: Green) and DAPI (C: Blue). The cells were visualized and photographed by fluorescence microscope (bar= 50  $\mu$ m). D: Merged image.

**A** Dil-ac-LDL

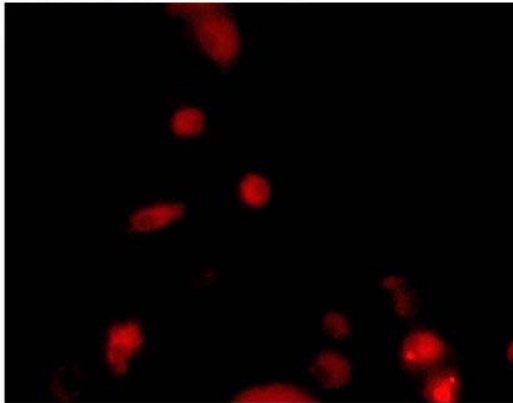

**B** FITC-UEA

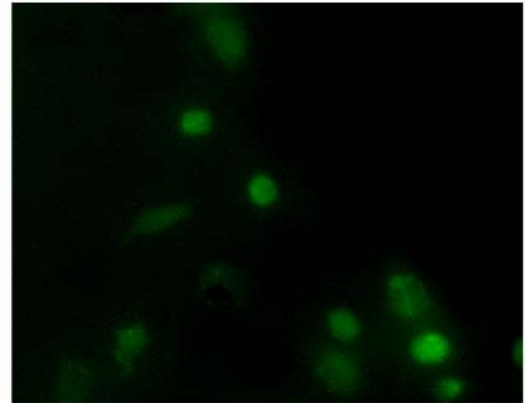

**C** DAPI

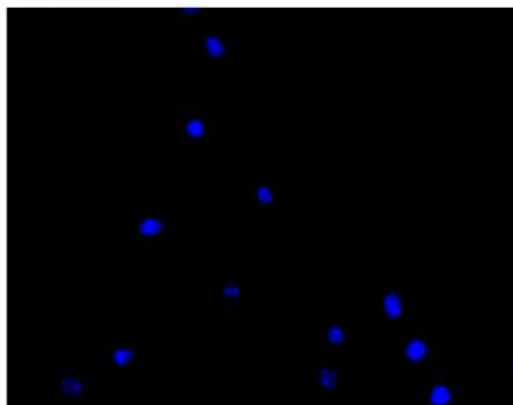

**D** Merge

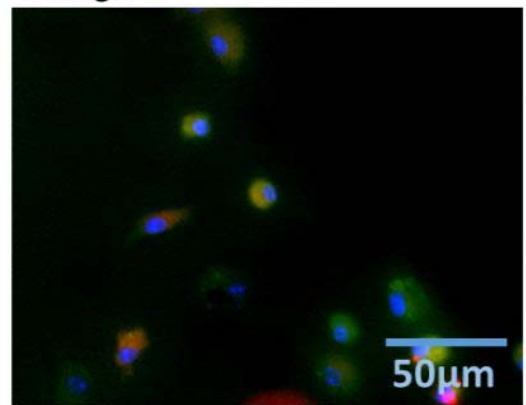

SUPPLEMENTARY DATA

**Supplementary Figure 2. PPAR $\alpha$  regulated ECFC mitochondrial function.** (A, D) Representative traces of OCR of WT (A) and PPAR $\alpha$ <sup>-/-</sup> (PKO) (D) ECFC transfected with AdPPAR $\alpha$  (MOI=50, 48-hour) or with AdGFP as control. (G) Representative traces of OCR of WT ECFC transfected with PPAR $\alpha$  siRNA compared with scrambled siRNA control. The injections of reagents (oligomycin, FCCP, RAA) during the Seahorse analysis were indicated by arrows. Basal OCR (B, E and H) and ATP Production (C, F and I) (the basal respiration that potentially support ATP production) were calculated and compared. All values are mean $\pm$ SEM. n $\geq$ 3, \*P<0.05. \*\*P<0.01, \*\*\*P<0.001 and \*\*\*\*P<0.0001.

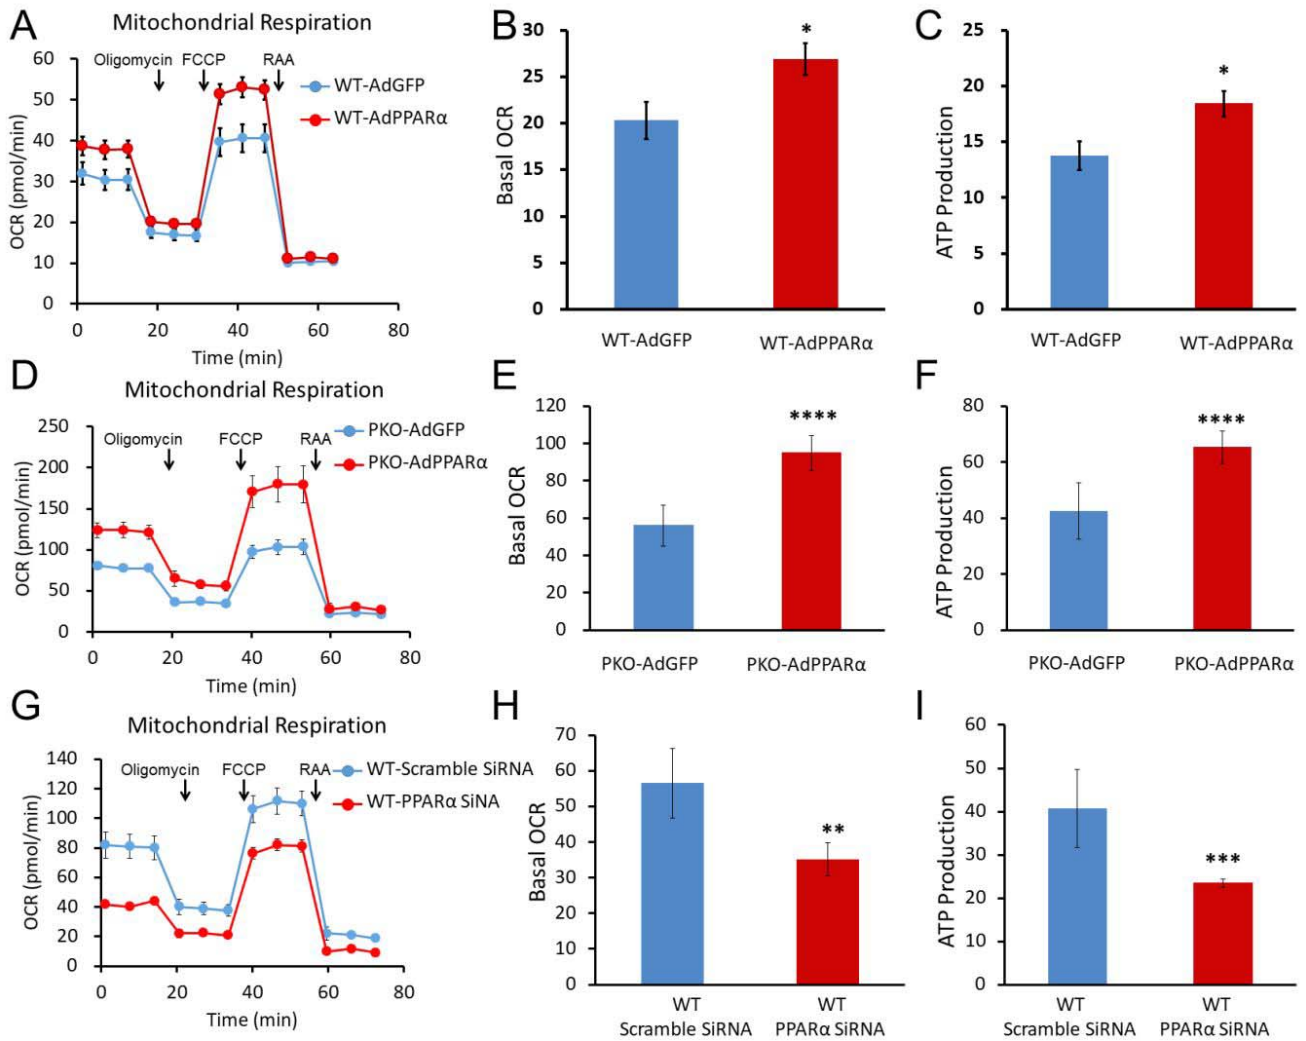

## SUPPLEMENTARY DATA

**Supplementary Figure 3. Effects of PPAR $\alpha$  on mitochondrial mass.** A&B: ECFC were immunostained for Tomm20 (Abcam, ab78547) following manufacturer's protocol. Images of ECFC were collected at the same setting in each experiment under an Olympus Fluoview (Version2.1a) (Confocal microscope, 100X objective). The fluorescence intensities of Tomm20 (green) were obtained using ImageJ software (NIH) and normalized by DAPI (blue) nuclei fluorescence intensity. A: Representative images showed the primary ECFC from WT and *PPAR $\alpha$ <sup>-/-</sup>* (KO) mice stained with Tomm20 and DAPI. B: Area ratio of mitochondria and nuclear (mito/nucleus) were calculated using ImageJ (n=3). C: Total DNA was extracted from primary WT and *PPAR $\alpha$ <sup>-/-</sup>* ECFC using *ZR-Duet<sup>TM</sup>* DNA/RNA MiniPrep Plus Kit (Zymo Research, Irvine, CA). The chip-based digital polymerase chain reaction (dPCR) was performed to quantify copies of mitochondrial DNA (mtDNA) as previously described (1). mtDNA copy numbers were calculated by qPCR and normalized by nuclear DNA concentration (n=5) (mean $\pm$ SEM, NS, no significant difference).

SUPPLEMENTARY DATA

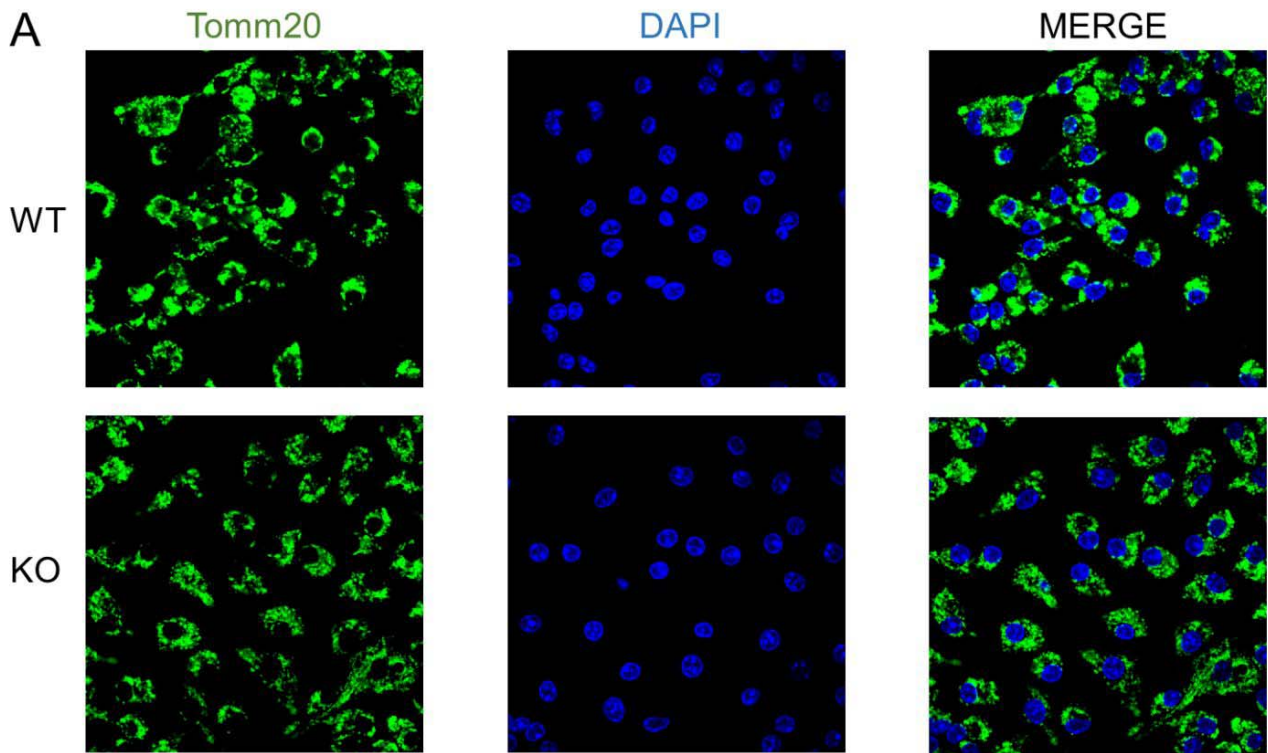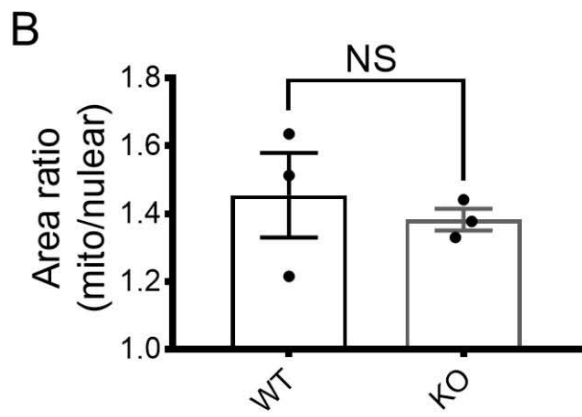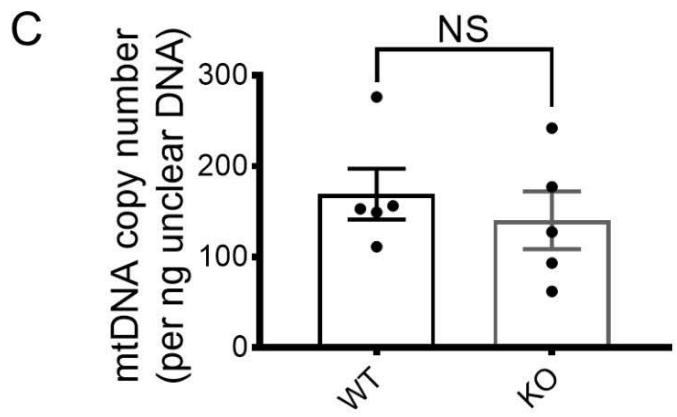

## SUPPLEMENTARY DATA

### **Reference**

1. Hong SN: [The usefulness of fecal calprotectin in differentiating between functional and organic bowel diseases: application in pediatric constipation patients]. *Korean J Gastroenterol* 2013;62:261-262
